1 **The mode of expression divergence in *Drosophila* fat body is infection-specific**

2 Bryan A. Ramirez-Corona, Stephanie Fruth, Oluchi Ofoegbu, Zeba Wunderlich\*

3

4 Department of Developmental and Cell Biology, University of California, Irvine, CA

5

6 \*Corresponding Author:

7 4107 Natural Sciences 2

8 University of California, Irvine

9 Irvine, CA 92697

10 949-824-5959

11 [zeba@uci.edu](mailto:zeba@uci.edu)

12

13 Running title: Expression divergence in the *Drosophila* fat body

14

15 Keywords: innate immune response; expression divergence; *Drosophila melanogaster*; fat body

16 **Abstract**

17 Transcription is controlled by the interactions of *cis*-acting DNA elements with diffusible *trans*-acting factors.  
18 Changes in *cis* or *trans* factors can drive expression divergence within and between species, and the relative  
19 prevalence of each can reveal the evolutionary history and pressures that drive expression variation.  
20 Previous work delineating the mode of expression divergence in animals has largely used whole body  
21 expression measurements in a single condition. Since *cis*-acting elements often drive expression in a subset  
22 of cell types or conditions, these measurements may not capture the complete contribution of *cis*-acting  
23 changes. Here, we quantify the mode of expression divergence in the *Drosophila* fat body, the primary  
24 immune organ, in several conditions. We performed allele-specific expression analysis using two  
25 geographically distinct lines of *D. melanogaster* and their F1 hybrids. We measured expression in the  
26 absence of infection and in separate infections with Gram-negative *S. marcescens* or Gram-positive *E.*  
27 *faecalis* bacteria, which trigger the two primary signaling pathways in the *Drosophila* innate immune  
28 response. The mode of expression divergence strongly depends on the condition, with *trans*-acting effects  
29 dominating in response to Gram-positive infection and *cis*-acting effects dominating in Gram-negative and  
30 pre-infection conditions. Expression divergence in several receptor proteins may underlie the infection-  
31 specific *trans* effects. Before infection, when the fat body has a metabolic role, there are many compensatory  
32 effects, changes in *cis* and *trans* that counteract each other to maintain expression levels. This work  
33 demonstrates that within a single tissue, the mode of expression divergence varies between conditions and  
34 suggests that these differences reflect the diverse evolutionary histories of host-pathogen interactions.

## 35 Introduction

36 Differences in gene expression are believed to be major drivers of phenotypic divergence in closely related  
37 species (King and Wilson 1975). These differences can arise through sequence changes in *cis*-regulatory  
38 elements, such as enhancers, or in the coding regions of *trans*-acting factors, such as transcription factors.  
39 Evolutionary processes rely on both changes in *cis* and changes in *trans*, and the prevalence and relative  
40 contributions of *cis* and *trans* changes are actively being explored in various model systems (Signor and  
41 Nuzhdin 2018). For example, within individual *Drosophila melanogaster* lines or between *Drosophila* species,  
42 the contributions of *cis*-acting changes generally increase with phylogenetic distance, and the precise  
43 balance of *cis* versus *trans* effects depend on the phylogenetic relationships and demographics of the  
44 genotypes being compared (Wittkopp et al., 2004, Wittkopp et al., 2008, McManus et al., 2010, Coolon et al.,  
45 2014, Osada et al., 2017). These studies have elucidated mode and tempo of the evolutionary processes  
46 driving gene expression divergence; however, most of these studies use whole body measurements, thus  
47 averaging signal across multiple tissue and cell types. Therefore, these studies cannot examine the  
48 prevalence of *cis* and *trans* changes in specific biological processes, which may be subject to different types  
49 of selection pressure. In addition, given that many *cis*-regulatory elements act in a tissue-specific manner,  
50 studies that measure *cis* and *trans* effects with tissue-specific resolution may reveal effects that are  
51 undetectable in heterogenous samples.

52 *Drosophila* have an innate, but not adaptative, immune response, and this response is a powerful  
53 system for measuring the contributions of *cis* and *trans* changes for several reasons. First, the immune  
54 response is inducible, with active and inactive states. This allows for the clear delineation of the transcriptional  
55 response of the immune system from that of other processes. Second, the fat body within the immune system  
56 is an optimal tissue for study. Though other tissues participate in the immune system, the fat body is a primary  
57 driver of the humoral response (Buchon et al., 2014) and is relatively easy to isolate. Lastly, there is ample  
58 variation in the resistance, survival, and transcriptional response to infection between individual *D.*  
59 *melanogaster* lines (Lazzaro et al., 2004, Lazzaro et al., 2006, Sackton et al., 2010, Hotson and Schneider  
60 2015), suggesting there are many sequence changes driving these differences.

61 To quantify changes in *cis* and *trans* that drive transcriptional divergence in the immune response, we  
62 used allele-specific expression analysis (ASE) of RNA-seq data (Wittkopp et al. 2004, Signor and Nuzhdin  
63 2018, Frochaux et al 2020). In this approach, we compare a gene's expression levels in two parental lines to  
64 the expression levels of each parental allele in the resulting F1 hybrids. Differences in expression due to  
65 changes in *cis*, for example a sequence change in a promoter or enhancer, will only affect the expression of  
66 the corresponding parental allele. Thus, changes in *cis* are independent of cellular environment and will be  
67 observed as allelic imbalance between the parents that is then maintained in the hybrids. Differences in *trans*,  
68 for example a coding sequence change in a transcription factor, will affect the expression of both alleles in the  
69 F1 hybrids and thus will be observed as differential expression in the parental lines that is not maintained in  
70 the F1 hybrids. Combining ASE with RNA-seq allows us to determine the prevalence of *cis* and *trans* changes  
71 genome-wide.

72 When comparing the innate immune response of different *D. melanogaster* lines, it is not clear whether  
73 *cis* or *trans* changes will dominate. Changes in *cis* generally affect a single gene's expression and thus may  
74 easily tolerated, as they only introduce small amounts of phenotypic variation into a system. Changes in *trans*  
75 can affect the expression of many genes at once and thus efficiently introduce a large amount of phenotypic  
76 variation but may be harder for the organism to tolerate. However, the specific biology of the innate immune  
77 response may temper this expectation. Antimicrobial peptides (AMPs) are among the most highly up-regulated  
78 genes in response to infection; however, changes to their expression, and even deletion of individual AMP  
79 genes, often have little to no measurable effect of infection survival (Hanson et al., 2019). This suggests that  
80 to get an appreciable phenotypic effect, synchronous changes in gene expression are required, which can  
81 result from a single change in *trans*-acting factors. In addition, previous work has suggested that within  
82 *Drosophila melanogaster* lines, *trans* changes are typically more prevalent (Wittkopp et al., 2008, Coolon et  
83 al., 2014).

84 To measure the contributions of *cis* and *trans*-acting changes in the *Drosophila* innate immune  
85 response, we measured fat body gene expression in two sequenced inbred *Drosophila* lines and their F1  
86 hybrids in control and infection conditions. We separately infected the animals with either Gram-positive

87 *Enterococcus faecalis* or the Gram-negative *Serratia marcescens* to trigger the two primary immune signaling  
88 pathways in the fly. Using ASE analysis, we quantified the contribution of *cis* and *trans* effects in the control  
89 and in each infection condition and found that *cis* effects dominated the expression divergence among control  
90 and *Enterococcus faecalis*-infected samples, while *trans* effects were dominant in the *Serratia marcescens*-  
91 infected samples. Further analysis suggested that expression differences in several receptor proteins may be  
92 driving the observed *trans*-acting changes. In sum, our work suggests that the relative importance of *cis* and  
93 *trans* acting changes may be highly dependent on the dominant biological process, even within a single tissue.

94

## 95 **Results**

### 96 **Two geographically-distinct lines show ample genotype-specific immune response**

97 To measure the relative contributions of *cis*- and *trans*-acting effects in the innate immune response, we  
98 needed two inbred, sequenced strains of *D. melanogaster* with abundant genetic variation and phenotypic  
99 differences in the immune response. The founder lines of the *Drosophila* Synthetic Population Resource are  
100 inbred, sequenced, and genetically diverse, making them ideal candidates (King et al. 2012). To maximize  
101 the likelihood of finding both genetic and phenotypic variation in these lines, we selected two lines from  
102 different continents, the A4 line, also known as KSA2, collected from the Koriba Dam in South Africa, and the  
103 B6 line, collected from Ica, Peru. Using the available SNP data, we found 462,548 SNPs between A4 and  
104 B6, with about half of them falling into exonic regions, indicating that  $279,656/30,107,083 = 0.9\%$  of exonic  
105 bases varied between the genotypes. The extensive variation in the coding regions allowed us to map, on  
106 average, 11.2% ( $\pm 1.3\%$ ) of RNA-seq reads in an allele-specific manner.

107 To assess the divergence in the A4 and B6 immune responses, we measured gene expression pre-  
108 and post-infection in the abdominal fat body, the primary site of immune response. To do so, we performed  
109 RNA-seq on the dissected fat bodies of 4-day old males from both lines that had been infected with either  
110 Gram-positive *Enterococcus faecalis* (*Efae*) or Gram-negative *Serratia marcescens* (*Smar*). We selected  
111 these bacteria because in *D. melanogaster*, Gram-positive infections generally stimulate the Toll pathway,  
112 and Gram-negative infections generally stimulate the IMD pathway, though there is additional nuance due to

113 signaling crosstalk and the contributions of other signaling pathways (Buchon et al., 2014; Busse et al., 2007;  
114 Lemaitre and Hoffmann 2007; Tanji et al., 2010; Troha et al., 2018). We measured expression pre-infection  
115 and 3 hours post-infection, to capture the early transcriptional response prior to the complicating effects of  
116 feedback.

117 In response to *Efae* infection, we found sizable genotype-specific effects in the immune response. To  
118 detect these effects, we performed two types of differential gene expression analysis: we first compared  
119 control and infected samples to find *Efae*-responsive genes, and then within this group, we looked for genes  
120 differentially expressed between the A4 and B6 genotypes. We found 1165 differentially expressed genes  
121 between the control and infected samples regardless of genotype (Figure 1A). We categorized these *Efae*-  
122 responsive genes into three groups based on their differential expression between genotypes. Group 1  
123 genes are differentially expressed only in the control samples, Group 2 genes are differentially expressed  
124 only in the infected samples, and Group 3 genes are differentially expressed in both control and infected  
125 samples. Genes not categorized into any of these groups were designated as not showing genotype-specific  
126 expression. Of the 500 *Efae*-responsive genes showing genotype effects, 87% (433 genes) are in Group 2,  
127 while only 10 genes are in Group 1 and 57 genes in Group 3 (Figure 1B). This indicates that many *Efae*-  
128 responsive genes show genotype-specific expression, and these differences are typically only revealed in  
129 response to infection.

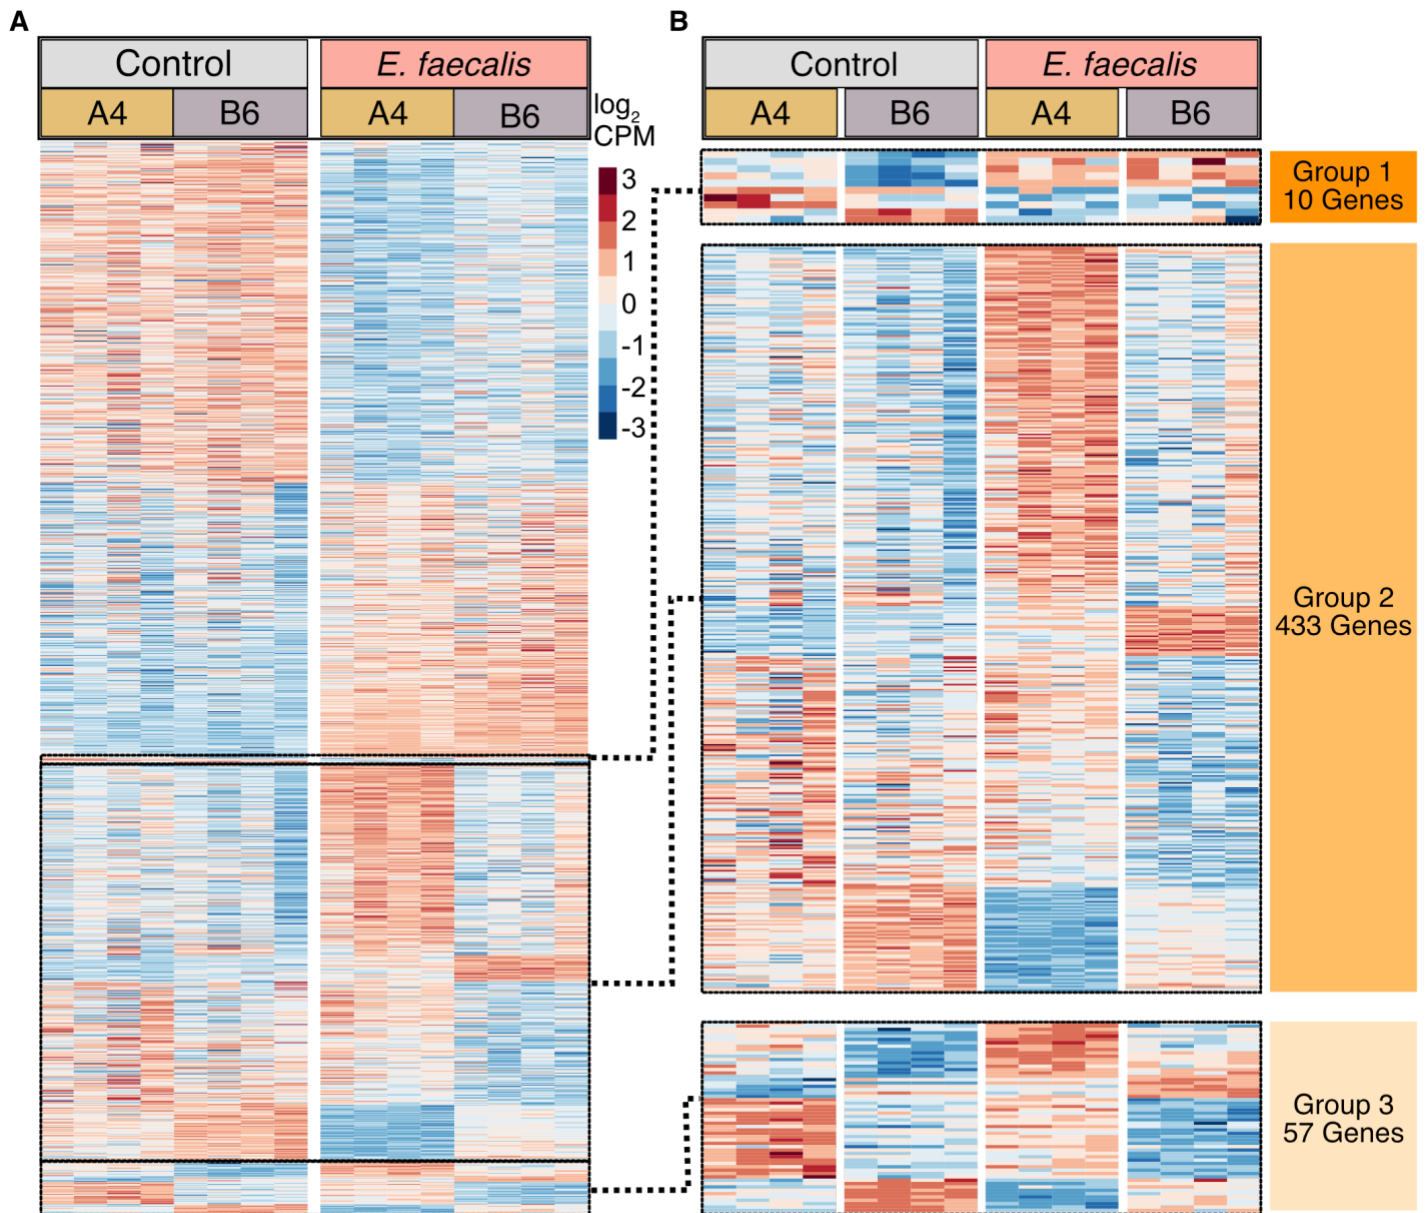

130  
131 **Figure 1. The A4 and B6 *D. melanogaster* lines have variation in their response to Gram-positive *E.***  
132 ***faecalis* infection.**

133 A) We measured expression in the fat bodies of the A4 and B6 lines infected with Gram-positive  
134 *Enterococcus faecalis* 3 hours post-infection. Of 11038 genes detected, we found 1165 differentially  
135 expressed in response to infection, relative to control samples, of which 201 were previously published  
136 *Drosophila* immune genes. Mean centered log<sub>2</sub> CPM values are displayed. B) We categorized the 1165  
137 *Efae*- responsive genes into three groups, based on their differential expression between the two fly  
138 genotypes: genes showing genotype-specific expression only in the control condition (Group 1), genes  
139 showing genotype-specific expression only in the infected condition (Group 2) and genes showing genotype-  
140 specific expression in both control and infected conditions (Group 3). The majority of genes fell into the  
141 Group 2 classification, indicating a large amount of genotype-specific expression variation is revealed upon  
142 infection with *Efae*. The fewest genes were classified into Group 1, suggesting that in the resting state there  
143 are few genotype-specific differences in the *Efae*-responsive gene set.

144 In response to the *Smar* infection, we found 1203 differentially expressed genes between the control  
145 and infected samples (Figure 2A). To look for genotype-specific expression, we categorized the 1203 *Smar*-  
146 responsive genes into the three previously mentioned groups. For this infection, we found roughly equal  
147 numbers of genes in each group, with 89, 91, and 84 genes in Groups 1-3, respectively (Figure 2B). This  
148 indicates that a higher fraction of *Smar*-responsive genes show genotype effects prior to infection than *Efae*-  
149 responsive genes ( $p = 1.1 \times 10^{-11}$ , Chi-square test, Bonferroni corrected), while a higher fraction of *Efae*-  
150 responsive genes show genotype effects after infection ( $p = 9.5 \times 10^{-67}$ , Chi-square test, Bonferroni corrected)

151 To assess whether there is also phenotypic divergence on the organismal level, we performed the  
152 *Efae* and *Smar* infections and measured survival and bacterial load for 7 days post-infection. In response to  
153 *Efae* infection, we found differences in the ability to survive infection between genotypes, with B6 showing  
154 greater ability to survive infection over A4 (Supplemental Figure S1A). In response to *Smar*, we found that  
155 while there were no significant differences in survival, bacterial load was lower in A4 than in B6  
156 (Supplemental Figure S1B, S1C). Together, these data demonstrate that there are differences between the  
157 two lines in their ability to resist or survive infection, and that these differences are pathogen specific.

158 To compare our tissue-specific measurements to previous work, we intersected our *Efae*- and *Smar*-  
159 responsive genes to an existing list of immune-responsive genes. This list is an expanded version of the  
160 *Drosophila* immune responsive genes set (DIRGS) and constitutes the summation of more than two decades  
161 of work in *Drosophila* (De Gregorio et al., 2001; Lemaitre and Hoffman 2007; Troha et al., 2018). Of 538  
162 genes on this expanded list, we found more than half of these (297 genes) were identified as immune-  
163 responsive in our data (Figure 2C). Troha and colleagues identified a subset of immune-responsive genes as  
164 the core of the immune response, i.e. the set of genes that is differentially expressed regardless of the type  
165 of bacterial infection (Troha et al., 2018). We found that of these 252 core genes, approximately 40% were  
166 found to be both *Smar*- and *Efae*-responsive in our data. CrebA, which was identified as a core gene  
167 essential for both Toll and IMD-driven immune response, is one of the genes found in this overlap. Therefore,  
168 despite differences in the genetic background, tissue (previous studies were typically done with whole body



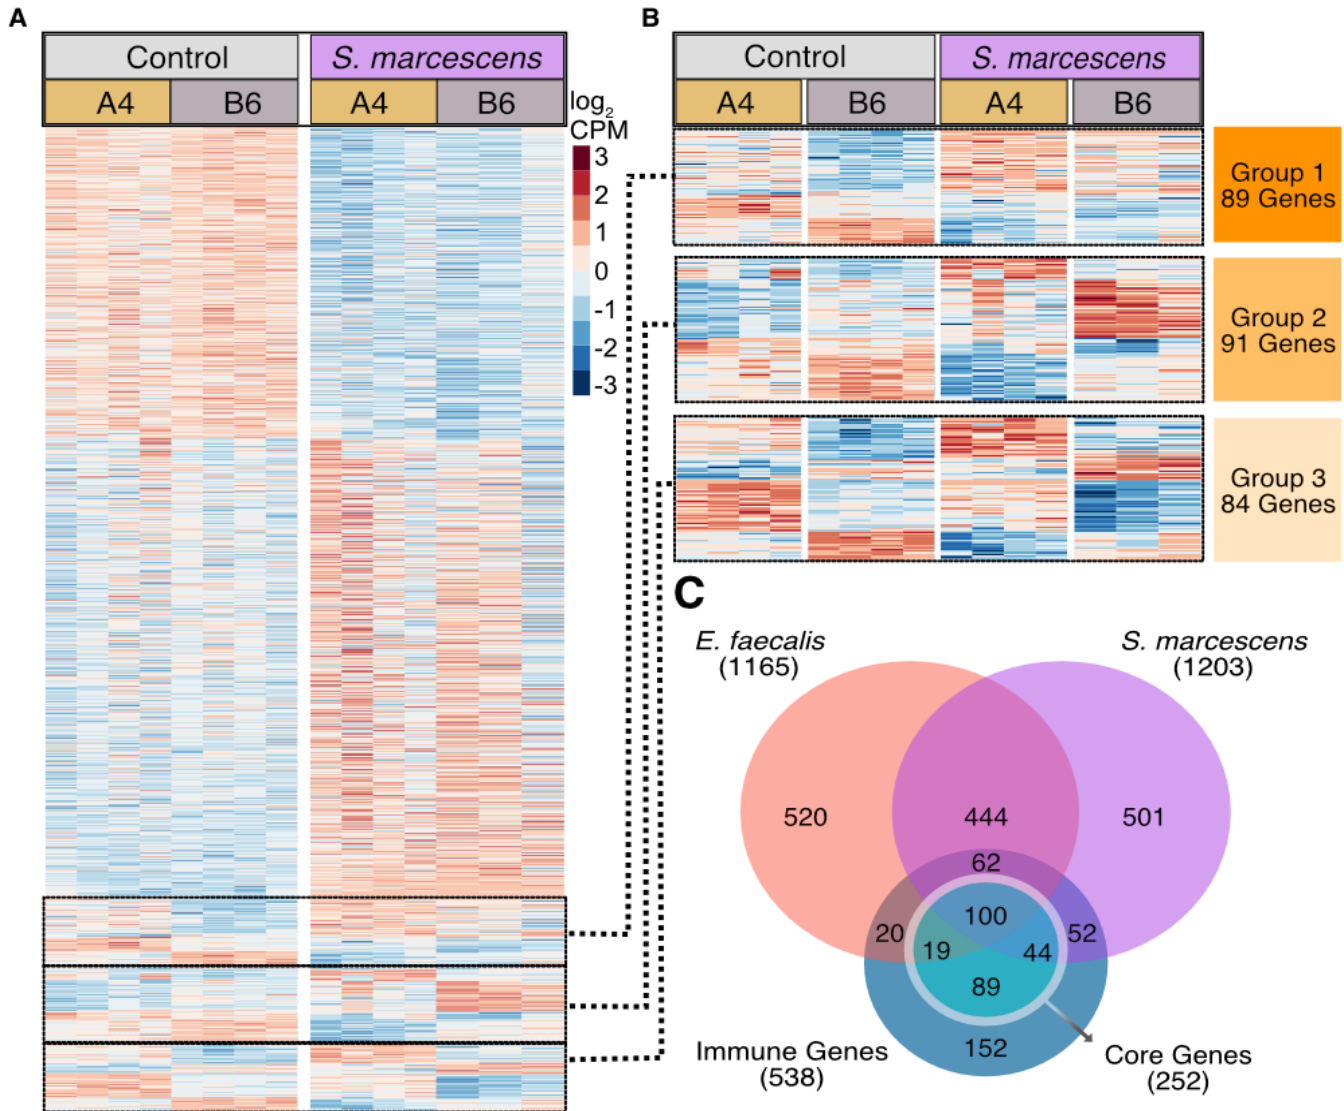

**Figure 2. The A4 and B6 *D. melanogaster* lines vary in their response to Gram-negative *S. marcescens* infection.**

A) We measured expression in the fat bodies of the A4 and B6 lines infected with Gram-negative *Serratia marcescens*. Of 11071 genes detected, we found 1205 differentially expressed genes between the control and infected samples; 258 were previously described *Drosophila* immune genes. Mean centered log<sub>2</sub> CPM values are displayed. B) We categorized the 1205 genes into the three previously described groups (Figure 1). Among *Smar*-responsive genes, roughly equal numbers show expression differences between the genotypes before (Group 1), after (Group 2), and both before and after infection (Group 3). C) We intersected the genes we identified as differentially expressed in response to infection and a list of previously published immune responsive genes. This list of immune genes is an expanded version of the *Drosophila* Immune Responsive Genes Set (DIRGS). More than half of the verified immune genes were identified as differentially expressed in the abdominal fat body, with half of these immune genes being shared between conditions. Among these previously identified immune genes, core genes are differentially expressed across all infections. We detected roughly 40% of the core set as differentially expressed in both our infection conditions, despite differences in the genetic background, tissue type, and time point used in our study versus previous work.

169  
170  
171  
172  
173  
174  
175  
176  
177  
178  
179  
180  
181  
182  
183  
184  
185

186 sampling), and time points, our findings show concordance with previous studies of gene expression in  
187 response to infection. More importantly, we show that the A4 and B6 lines have phenotypic divergence both  
188 in expression of immune-responsive genes and the ability to fight infection, making them suitable for  
189 subsequent F1 hybrid experiments.

190

### 191 ***Cis*-acting effects dominate expression variation in the uninfected fat body**

192 To effectively quantify *cis* and *trans* effects, we needed to verify our ability to accurately analyze the allelic  
193 expression in F1 hybrids. To do so, we used the RNA-seq data from the A4 and B6 parental lines mentioned  
194 above as well as data from the F1 hybrids (A4 $\sigma$ x B6 $\phi$ ) and reciprocal crosses (B6 $\sigma$ x A4 $\phi$ ), in the control,  
195 *Efae*-infected, and *Smar*-infected conditions. Since we are using males, if our allele-specific expression  
196 analysis is correct, none of X-chromosome reads should map to the paternal genotype. Using the published  
197 A4 and B6 genomes and the Allele-Specific Alignment Pipeline (ASAP) (Krueger,  
198 <https://www.bioinformatics.babraham.ac.uk/projects/ASAP/>), we quantified the fraction of X-chromosome  
199 reads that incorrectly map to the paternal genotype. On average, samples had 0.5% mis-assigned reads  
200 (standard deviation = 3%), with the highest fraction being 1.2% (Supplemental Table S1). The consistent, low  
201 level of mis-assigned reads verifies our ability to accurately quantify allelic expression.

202 We next sought to quantify *cis* and *trans* effects in the control samples. We used the complete set of  
203 parental RNA-seq reads and the subset of the F1 hybrid reads that could be assigned to a specific allele.  
204 Using three separate generalized linear models, we tested for differential expression in the parents, allelic  
205 imbalance in the F1 hybrids, and *trans* effects between parents and F1 hybrids (see Methods) (Davidson and  
206 Balakrishnan, 2016; Osada et al., 2017; Takada et al., 2017). We then categorized each gene into one of six  
207 categories (Figure 3A). Genes showing no differential expression in the parents or F1 hybrids have no  
208 evidence of *cis* or *trans* effects and are called **conserved**. Genes showing differential expression in both the  
209 parents and F1 hybrids and no *trans* signal are categorized as ***cis*-only**. Genes showing differential

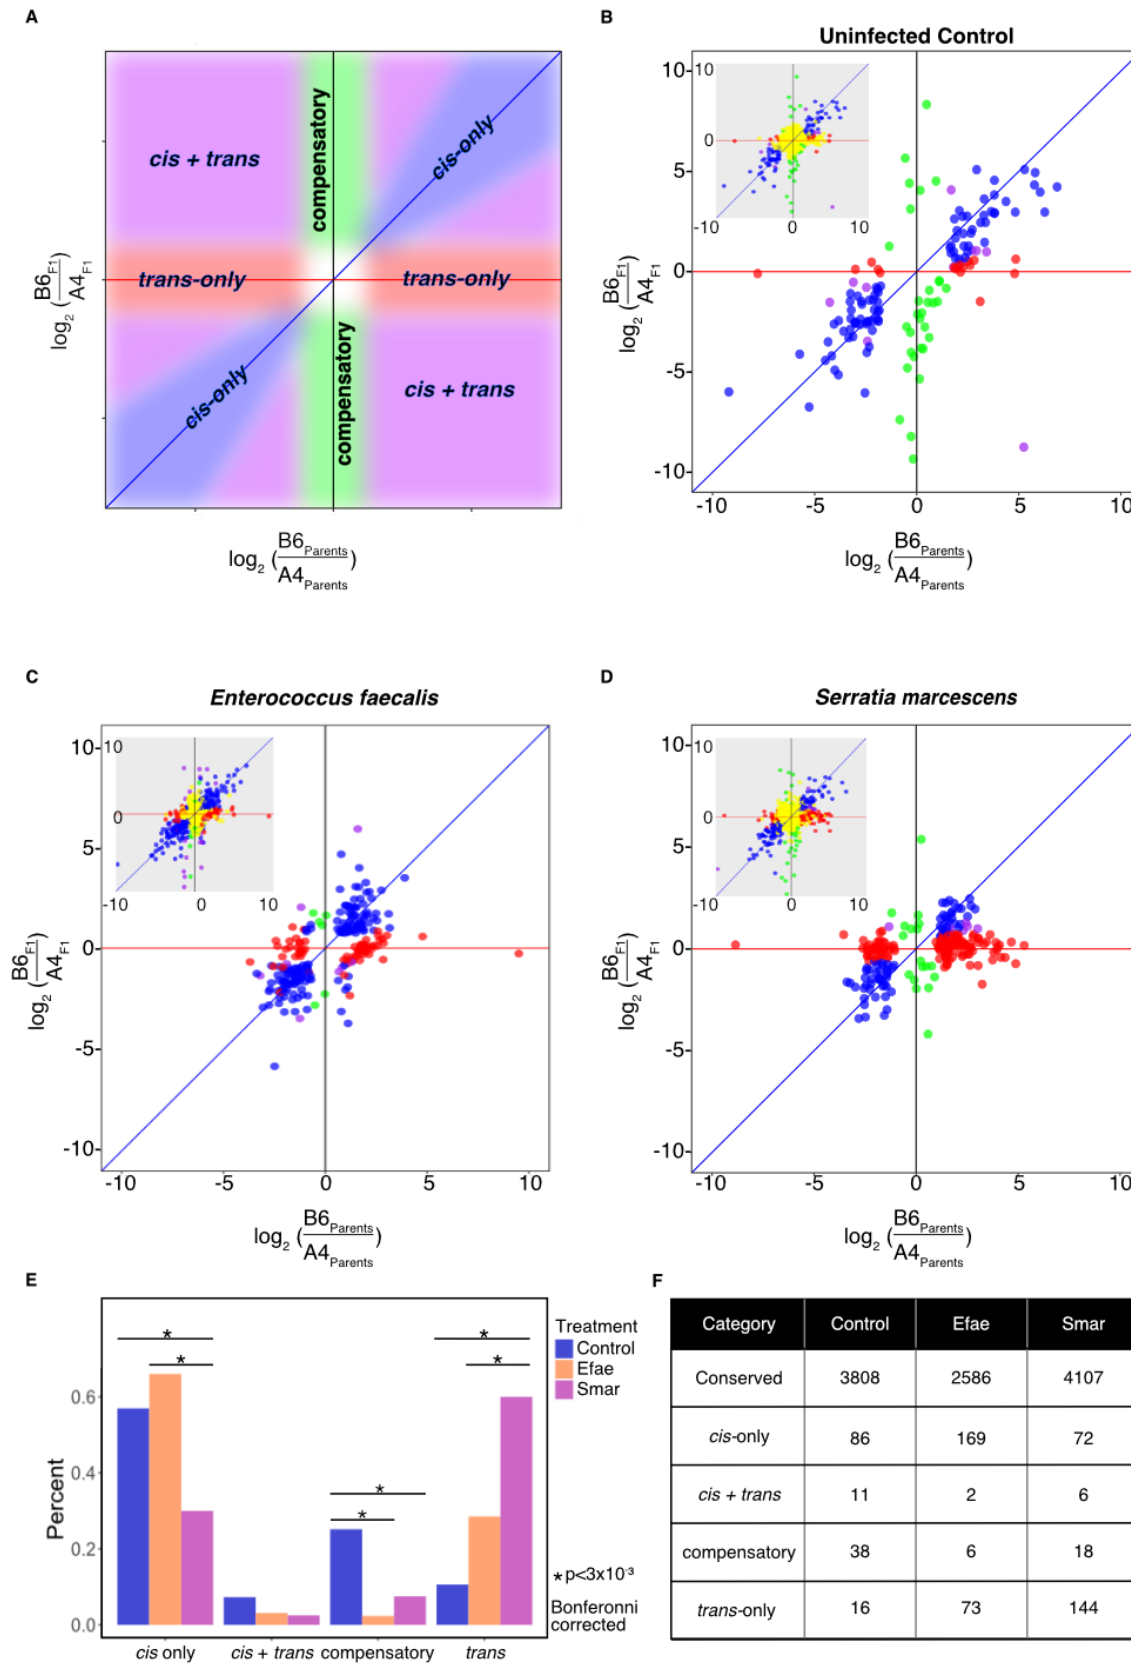

211 **Figure 3. The relative contributions of *cis* and *trans* effects to expression divergence are condition**  
212 **specific.**

213 A) Here we show a schematic of the expected locations of four of the six categories of causes of expression  
214 divergence, conserved (yellow) and undetermined genes are excluded from downstream analysis. B) In the  
215 uninfected control condition, of 4960 genes that could be detected, 151 genes showed *cis* or *trans* signal. 86  
216 genes show *cis*-only effects, 16 genes show *trans*-only effects, 11 genes show *cis* and *trans* effects, and 38  
217 show compensatory effects. C) In response to *Efae* infection, expression divergence is driven predominantly  
218 by changes in *cis*. There are 256 genes that show *cis* or *trans* signal and do not overlap with the 151 genes  
219 showing signal in the control condition. Of 256 genes, 169 genes show *cis*-only signal, 86 genes show *trans*-  
220 only signal, 8 genes show a combination of *cis* and *trans* effects, and 6 genes show compensatory effects.  
221 D) In response to *Smar* infection, expression divergence is dominated by changes in *trans*. There are 240  
222 genes that show *cis* or *trans* signal not found in the uninfected control. In these 240 genes, 72 genes showed  
223 *cis*-only signal, 144 genes showed *trans*-only signal, 6 genes showed both *cis* and *trans* effects, and 18  
224 genes show compensatory effects. E) We compared the fraction of genes categorized into each divergence  
225 class in the three conditions and found that the modes of expression divergence were condition-specific.  
226

227 expression in the parents and not the F1 hybrids are categorized as ***trans*-only**. Some genes show evidence  
228 of both *cis* and *trans* effects and are categorized as either ***compensatory*** (if the changes have opposing  
229 effects on expression) or ***cis* + *trans*** (if the changes are coherent). Genes that do not fall into any of these  
230 categories have an ambiguous pattern of divergence and are called ***undetermined***.

231 Of the 4960 genes that were both expressed in the pre-infection fat body and could be detected in an  
232 allele-specific manner, 77% were categorized as conserved (3808 genes; Figure 3B). We found 151 genes  
233 showing unambiguous *cis* or *trans* effects. In these 151 genes, *cis* effects dominated the signal: 90% of  
234 genes (135 genes) showed *cis* signal (including *cis*-only, *cis* + *trans* and compensatory genes), and 57% (86  
235 genes) showed *cis*-only effects. 43% of genes (65 genes) showed *trans* signal and only 10% of genes (16  
236 genes) showed *trans*-only effects. One-quarter of genes (38 genes) were categorized as compensatory,  
237 even when using non-overlapping samples to detect *cis* and *trans* effects, which avoids the artificial inflation  
238 of compensatory signal (Fraser et al., 2019; Zhang and Emerson, 2019). Additionally, to ensure that any  
239 differences in the quality of our in-house A4 and B6 transcriptomes do not affect our conclusions, we  
240 quantified *cis* and *trans* effects using sets of high confidence genes at multiple levels of stringency and found  
241 that this had negligible effects on the detected signal (Methods; Supplemental Figures S2; Supplemental  
242 Table S2). From these data, we can conclude that in the unstimulated state, most genes have conserved

243 expression levels in the fat body, and among those genes that diverge, *cis* effects dominate, with a sizable  
244 number of genes showing compensatory *cis* and *trans* changes.

245

#### 246 **More *cis* than *trans* effects are found in *Efae*-infected fat body expression**

247 We quantified *cis* and *trans* effects in *Efae*-infected samples following the same methodology. We found  
248 roughly 52% of genes (2586 genes) showed no evidence of *cis* or *trans* effects and 381 genes showed  
249 unambiguous *cis* or *trans* effects (Figure 3C). To identify genes whose expression divergence is specific to  
250 the immune response, we eliminated genes that show *cis* or *trans* signal in the control sample. After this  
251 filtering, roughly 88% of the genes showing *cis* or *trans* effects (336 genes) remained; 66% of these genes  
252 (169 genes) show *cis-only* signal, and 28% (73 genes) show *trans-only* signal. Only 8 genes (3%) show a  
253 combination of *cis* and *trans* effects, with only 6 genes showing compensatory effects. Of the genes that  
254 show *cis-only* signal, roughly even numbers of genes show higher expression in each genotype, consistent  
255 with the idea that *cis*-acting changes affect a single gene at a time. In contrast, of the genes showing *trans-*  
256 *only* signal, nearly twice as many were expressed more highly in the B6 genotype (47 genes) than in the A4  
257 genotype (26 genes) ( $p = 0.00962$ , Chi-square test), suggesting that one or a few changes in upstream  
258 regulatory factors are responsible for this observation. Since we do not observe this trend towards higher B6  
259 expression in the control samples and have removed genes that showed any evidence of mapping bias  
260 between the two genotypes (Methods), we are confident this trend is not an artifact and reflects true  
261 biological differences in the immune response. In sum, we find both *cis* and *trans* effects drive *Efae*-  
262 responsive expression divergence, with *cis* effects dominating and few genes showing compensatory  
263 changes.

264

#### 265 ***Trans* effects dominate expression variation in the *Smar*-infected fat body**

266 Lastly, we quantified *cis* and *trans* effects in response to *Smar* infection. We found roughly 82% of genes  
267 (4107 genes) are conserved, and 357 genes showed unambiguous *cis* or *trans* signal (Figure 3D). We again  
268 filtered out genes that show *cis* or *trans* effects in the control samples and were left with 240 genes that have

269 immune-specific signal. Of these, 30% (72 genes) showed *cis-only* signal, and roughly equal numbers of *cis-*  
270 *only* genes showed higher expression in each genotype. 10% (24 genes) showed both *cis* and *trans* effects,  
271 and within these genes, 18 genes had compensatory signal. Surprisingly, 60% of genes (144 genes) showed  
272 *trans-only* signal. Within *trans-only* genes, we found that 71% showed greater expression in B6. Though the  
273 *Efae* analysis found far fewer genes affected in *trans*, the proportion of *trans-only* genes showing higher B6  
274 expression was similar. This suggests that some of the upstream differences giving rise to the *trans* effects  
275 may be shared between the two infection conditions. In summary, in response to *Smar* infection, *trans* effects  
276 drive the majority of expression divergence between the two genotypes and few genes show compensatory  
277 effects.

### 278 **Comparisons of *cis* and *trans* signals in different conditions reveal both infection-specific and** 279 **shared divergence**

280 To systematically assess how *cis* and *trans* effects contribute to expression variance in the same tissue  
281 under different conditions, we compared the proportion of genes falling into the different divergence  
282 categories. The control and *Efae*-infected samples had a greater proportion of *cis-only* genes than the *Smar*  
283 samples (control vs. *Smar*  $p = 1.97e-06$ , *Efae* vs. *Smar*  $p = 1.97e-14$ , Chi-square test, Bonferroni-corrected).  
284 However, all three groups differ in the proportion of *trans-only* genes, with *Smar*-infected samples showing  
285 more than twice the proportion of genes with *trans-only* signal, followed by *Efae*, and then the control  
286 samples (control vs. *Efae*  $p = 3.7e-04$ , control vs. *Smar*  $p < 2.2e-16$ , *Efae* vs. *Smar*  $p = 2.79e-11$ , Chi-square  
287 test, Bonferroni-corrected). We also found that the uninfected fat body showed significantly more  
288 compensatory signal than either infected sample (control vs. *Efae*  $p = 2.35e-11$ , control vs. *Smar*  $p = 2.26e-$   
289  $05$ , Chi-square test, Bonferroni-corrected). Taken together, this suggests that before infection, when the fat  
290 body is carrying out its metabolic functions, there is less pressure for expression divergence, as supported by  
291 the large number of compensatory changes and conserved genes. In genes that show expression  
292 divergence in the control condition, *cis*-acting changes, which have local, non-pleiotropic effects, dominate.  
293 In response to infection, there is ample expression divergence, which is driven by both *cis* and *trans* effects.

294 The extent to which each type of effect contributes is dependent on the particular pathogen, suggesting that  
295 the relative importance of local and pleiotropic changes is specific to different infection pressures.

296         Though we generally expect the two infections to regulate gene expression via distinct signaling  
297 pathways, we also anticipated some genes would be regulated in both infections, either due to crosstalk  
298 between the IMD and Toll pathways (Busse et al., 2007; Tanji et al., 2010) or via more general infection and  
299 wound responses. We found 75 genes with unambiguous *cis* and/or *trans* signal in response to both *Efae*  
300 and *Smar* infection (Supplemental Data). Of these genes, 61 showed concordant classification and the  
301 remaining 14 genes did not. Thereofre, in the majority of genes shared between these two infections, the  
302 same genetic differences are likely driving the expression divergence in both infection conditions.  
303 Additionally, in rare cases, a single gene can experience either *cis* or *trans* effects depending on the infection  
304 context.

305

### 306 **Differential expression of detection genes is a likely source for genotype expression bias in observed** 307 ***trans* effects**

308 Since we observed that genes with *trans-only* effects tended to be more highly expressed in B6 than in A4 in  
309 both infection conditions, we hypothesized that changes in a handful of upstream immune factors are  
310 responsible for this phenomenon. The changes in upstream regulators can either be infection-specific or  
311 shared, and genes affected by shared regulators would show *trans* signal in both infections. Out of 217  
312 genes showing *trans-only* signal in either infection, only 13 genes were shared, 4 with higher expression in  
313 A4, and 9 with higher expression in B6. The small number of genes that show *trans* effects in both infection  
314 conditions indicates that the bulk of *trans*-acting changes are likely infection-specific and not driven by a  
315 shared infection or wound healing response.

316         To find likely sources of infection-specific *trans* effects, we hypothesized that immune detection  
317 genes, signaling genes, or transcription factors differentially expressed between genotypes in the control  
318 condition would be likely candidates, since these genes have the ability to affect the expression of many

319 downstream targets. Further, we posited that these genotype-specific differences had to be present in the  
320 control to have the effects at the 3-hour post-infection timepoint. Of the approximately 300 genes that are  
321 differentially expressed between genotypes in the control samples, we found 22 genes that are prime  
322 candidates (Table 1). Fourteen are previously identified immune-responsive genes, and eight are  
323 transcription factors not yet implicated in immune response, but that may be peripherally involved.

324 Five peptidoglycan recognition proteins (PGRP) genes are potential mediators of the large number of  
325 *trans* effects observed in the *Smar* infection. Four of these PGRPs (PGRP-SC1a, PGRP-SC1b, PGRP-SC2,  
326 PGRP-LB) are negative regulators of the IMD response, and the last gene, PGRP-SD is positive Toll and  
327 IMD regulator (Bischoff et al., 2006; Zaidman-Rémy et al., 2006; Iatsenko et al., 2016; Charroux et al., 2018;  
328 Lu et al., 2020). Three of the negative regulators, PGRP-SC1a, PGRP-SC1b, PGRP-SC2, are more highly  
329 expressed in A4. Given that these are negative regulators of the IMD pathway, this finding is congruent with  
330 the observation that genes showing *trans-only* signal tend to show greater expression in B6. PGRP-SD is  
331 more highly expressed in B6, and, given its role as a positive regulator of the IMD response, it is also  
332 consistent with the trend of higher expression of genes showing *trans-only* signal in the B6 line. The last  
333 negative regulator of IMD response, PGRP-LB, was also found to have higher expression in B6. Since there  
334 are more negative regulators showing higher expression in A4 than B6, it is possible the balance of negative  
335 to positive regulators can account for the expression trend observed in *Smar trans-only* genes. It is also  
336 possible that the greater expression of PGRP-SD is enough to account for the differences observed.

337 Though there were fewer *trans* effects in the *Efae*-infected samples than in the *Smar*-infected  
338 samples, the pattern wherein nearly twice as many genes showed greater expression in B6 than A4 was  
339 maintained. Of the 22 candidate genes, we found two Toll-specific genes that may be responsible for the  
340 observed signal: *Spatzle-Processing Enzyme (SPE)* and *spatzle (spz)*, which are more highly expressed in

341 **Table 1: Transcription factors and immune genes identified as potential sources of trans effects in**  
342 **infection.**

343 List of genes potentially involved in observed *trans* effects for *Efae* and *Smar* infection. Candidate genes  
344 were identified by finding genes that had genotype-specific expression differences in the uninfected control  
345 conditions and were classified as either a transcription factor, immune signaling gene, or immune detection  
346 gene.



| FB Gene ID  | Gene name    | Type           | Log <sub>2</sub> Fold Change (B6/A4) | More Highly Expressed in: | A4 Average CPM | B6 Average CPM | Immune involvement        |
|-------------|--------------|----------------|--------------------------------------|---------------------------|----------------|----------------|---------------------------|
| FBgn0029822 | CG12236      | TF             | -3.13                                | A4                        | 28             | 2.7            | Unclear                   |
| FBgn0039075 | CG4393       | Signaling      | 2.06                                 | B6                        | 8.8            | 39             | Unclear                   |
| FBgn0038978 | CG7045       | TF             | 3.06                                 | B6                        | 7              | 57             | Unclear                   |
| FBgn0001981 | esg          | TF             | -3.27                                | A4                        | 11             | 1              | Unclear                   |
| FBgn0039932 | fuss         | TF             | 2.50                                 | B6                        | 1.1            | 6.3            | Unclear                   |
| FBgn0250732 | gfzf         | TF             | 8.24                                 | B6                        | 0              | 2              | Unclear                   |
| FBgn0000448 | Hr46         | TF             | -4.12                                | A4                        | 10             | 0.7            | Unclear                   |
| FBgn0016675 | Lectin-galC1 | Detection      | 2.72                                 | B6                        | 79             | 570            | Binding and agglutination |
| FBgn0035993 | Nf-YA        | TF             | -10.16                               | A4                        | 10             | 0              | Unclear                   |
| FBgn0028542 | NimB4        | Detection      | -1.08                                | A4                        | 40             | 22             | Unclear                   |
| FBgn0259896 | NimC1        | Detection      | -3.06                                | A4                        | 97             | 27             | Unclear                   |
| FBgn0003130 | Poxn         | TF             | -4.38                                | A4                        | 1.2            | 0.07           | Unclear                   |
| FBgn0014033 | Sr-CI        | Detection      | -2.39                                | A4                        | 84             | 38.6           | Unclear                   |
| FBgn0004606 | zfh1         | Signaling / TF | 1.77                                 | B6                        | 50             | 17             | Unclear                   |

|             |           |           |       |    |       |       |                                    |
|-------------|-----------|-----------|-------|----|-------|-------|------------------------------------|
| FBgn0031973 | Spn28Dc   | Signaling | 2.56  | B6 | 9.4   | 2.4   | Negative regulator of melanization |
| FBgn0037906 | PGRP-LB   | Detection | 4.536 | B6 | 111.9 | 75.2  | Negative regulator of IMD pathway  |
| FBgn0043576 | PGRP-SC1a | Detection | -5.57 | A4 | 4.3   | 6.8   | Negative regulator of IMD pathway  |
| FBgn0033327 | PGRP-SC1b | Detection | -5.24 | A4 | 3.9   | 0.2   | Negative regulator of IMD pathway  |
| FBgn0043575 | PGRP-SC2  | Detection | -4.02 | A4 | 15    | 1.3   | Negative regulator of IMD pathway  |
| FBgn0035806 | PGRP-SD   | Detection | 4.25  | B6 | 97.6  | 19.2  | Positive regulator of IMD pathway  |
| FBgn0039102 | SPE       | Signaling | 2.41  | B6 | 491.9 | 255.2 | Positive regulator of Toll pathway |
| FBgn0003495 | spz       | Signaling | 0.68  | B6 | 72.8  | 45.5  | Positive regulator of Toll pathway |

347

348 B6. *Spatzle* is the Toll receptor ligand, and *SPE* is required to generate the active form of *spz*, so differential  
 349 expression of these genes can drive a large number of downstream changes. In addition, PGRP-SD can act  
 350 as a positive regulator of both the Toll and IMD responses and is also found to have higher expression in the  
 351 B6 line.

352 In addition to differences in expression levels between genotypes, function-altering differences in the  
 353 coding sequences of key immune genes may also be the source of the observed *trans*-acting changes. To  
 354 analyze the pattern of coding sequence variants, we used the Ensembl Variant Effect Predictor (VEP) to  
 355 identify the proportions of synonymous to nonsynonymous coding changes between A4 and B6 in several  
 356 gene sets (McLaren et al., 2016). We considered all genes expressed in the fat body above a threshold  
 357 (CPM>1), and then sorted them into two groups: genes that are differentially expressed in response to either  
 358 or both infections (*DE infection*) and those that are not (*fat body detected*). We also generated a gene set  
 359 that is the intersection between *DE infection* and our list of curated immune-responsive genes (*DE immune*;

360 Figure 4A). We posited that, given the large number of *trans* effects in response to infection, immune-related  
361 genes may have a greater number of nonsynonymous to synonymous changes, compared to the *fat body*  
362 *detected* gene set. We found that *DE immune* genes have a significantly higher fraction of nonsynonymous  
363 sequence changes (24%) compared to the *fat body detected* genes (21%) ( $p = 0.007$ , Chi-square test,  
364 Bonferroni-corrected), suggesting that some of these changes may be under selection and possibly the  
365 source of our *trans*-acting signal (Figure 4B-C). *DE infected* genes showed lower fractions of  
366 nonsynonymous changes (20%) compared to the *fat body detected* genes ( $p = 0.04$ , Chi-square test,  
367 Bonferroni-corrected). We may not see an elevated fraction of nonsynonymous changes in the *DE infected*  
368 gene set because this includes both immune-related genes, but also genes with unrelated functions whose  
369 expression may be regulated due to the metabolic constraints on the fat body tissue.

370 This analysis focuses on overall patterns of coding sequence changes in these large gene sets. We  
371 recognize that even an individual coding sequence change may drive many downstream expression  
372 differences and analyzed these changes, but no obvious candidates emerged (Supplemental Figures S3,  
373 Supplemental Table S3 and S4). Predicting the effect of these mutations on individual protein function,  
374 however, remains a challenge.

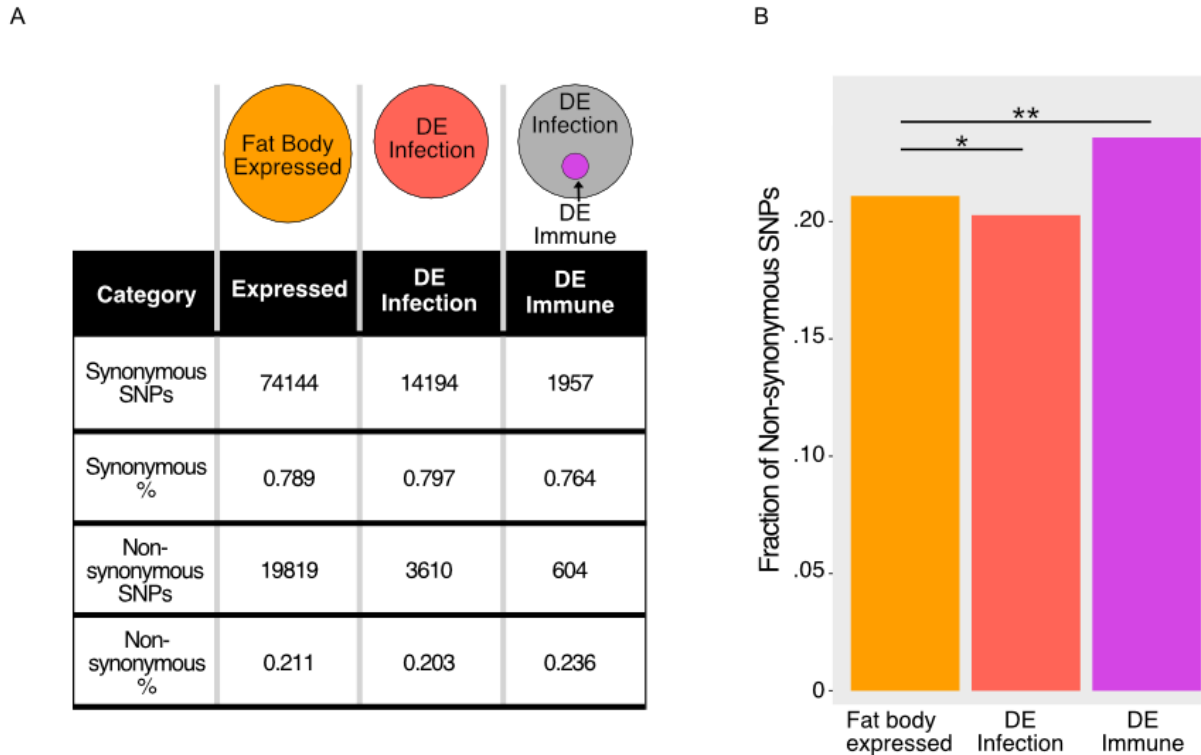

**Figure 4: There is a greater proportion of non-synonymous SNPs in previously identified immune-responsive genes.**

A) To look for the prevalence of non-synonymous SNPs, we defined three gene sets. Among genes detected in the fat body samples, we separated genes into those that were differentially expressed in response to either infection (DE infection), and those that were not (fat body expressed). Among the DE infection genes, we further refined the gene list to include only previously identified immune genes (DE immune). The numbers indicate the total number of SNPs found in each gene set. B) DE immune genes have a higher proportion of non-synonymous SNPs than the fat body expressed genes, which suggests they may be subject to different selection pressures. *p*-values are Bonferroni-corrected Chi-square test with the proportion of non-synonymous SNPs relative to the fat body expressed gene set.

## Discussion

Here, we quantified the mode and extent of expression divergence in the *Drosophila* abdominal fat body, both in an uninfected control condition, where it carries out a variety of metabolic roles, and in response to two types of infection. We found that two geographically isolated lines of *D. melanogaster* are phenotypically distinct in their immune responses, differing both on the organismal and transcriptional levels. By comparing gene expression in the fat body between these lines and their F1 hybrids, we quantified the contributions of *cis* and *trans* effects to expression divergence in the uninfected control, *Efae*-infected and *Smar*-infected conditions. Both the control and *Efae* infection conditions were dominated by *cis* effects, while the *Smar*

395 infection condition had an abundance of *trans* effects. Notably, the uninfected control also showed a greater  
396 proportion of compensatory effects, suggesting that there is stabilizing selection to maintain fat body  
397 expression levels of certain genes in the absence of an infection. Among the genes showing changes in  
398 *trans*, we found that expression of the B6 allele is typically higher in both types of infections. This suggests  
399 that changes to a small number of upstream immune response regulators may be responsible for this bias,  
400 and we identified expression divergence in a group of receptor programs that may drive these *trans* effects.  
401 Overall, we find that the mode of evolution in expression divergence can vary between conditions in a single  
402 tissue and likely represents condition-specific selection pressures.

403 Our unique approach to measuring the mode of expression divergence gave rise to several novel  
404 observations about the relative contributions of *cis* and *trans* effects on expression variation. While there  
405 have been a number of studies aimed at disentangling the contribution of *cis* and *trans* changes to gene  
406 expression in *Drosophila*, few have sought to answer this question using a single organ or with different  
407 physiological stimuli (Wittkopp et al., 2004, Wittkopp et al., 2008, McManus et al., 2010, Coolon et al., 2014,  
408 Osada et al., 2017). Our approach allows us to examine evolutionary changes in response to perturbation  
409 while minimizing the confounding effects of multiple tissue types. There are three studies most closely  
410 related to ours. A previous study by Juneja, et al. (2016) found, among geographically distinct flies, a large  
411 number of *cis*-acting changes that cause whole body expression divergence in response to an infection with  
412 mixture of bacteria. This is concordant with our finding of a large number of *cis*-acting changes in both  
413 infection conditions, but this study did not quantify *trans*-acting changes or distinguish between Toll- and  
414 IMD-specific responses. By measuring expression in the heads and abdomens of multiple *D. melanogaster*  
415 lines, another group reported the predominance of changes in *cis* over those in *trans* but did not measure  
416 these differences in different physiological states or attempt to dissect individual tissues in the head or  
417 abdomen (Osada et al., 2017). Most recently, Frochoux et al., (2020) sought to uncover the underlying  
418 genetics of *P. entomophila* resistance in the gut and identified a novel driver of this phenotype but limited  
419 their analysis to locally acting eQTLs. Here, we sought to directly assess the contribution of *cis* and *trans*

420 sequence changes in a single tissue in the context of multiple treatment conditions, giving a uniquely high-  
421 resolution view of the evolutionary sequence changes underlying expression divergence.

422 With our approach we were able to uncover two notable trends. First, we found that compensatory  
423 mutations were more frequent in the control samples. We observe that while overall compensatory effects  
424 are less common than *cis-only* and *-trans-only* effects, compensatory effects in the uninfected samples are  
425 more pervasive than in either of the infected conditions. Previous studies in several organisms had  
426 suggested that compensatory effects were very prevalent (McManus et al., 2010, Gonclaves et al., 2012,  
427 Schaefer et al., 2013, Coolon et al., 2014). This was perplexing because it would seem to suggest that, even  
428 in between species, selective forces to alter expression and to stabilize it were at odds and did not explain  
429 how biological systems are able to evolve divergent expression. However, certain choices in experimental  
430 design can inflate estimates of compensatory effects (Zhang and Emerson 2019; Fraser et al., 2019). To  
431 avoid this artifact, we use non-overlapping F1-hybrid samples and therefore have generated more accurate  
432 estimates of compensatory effects across multiple conditions. Additionally, a large proportion of studies  
433 addressing *cis* and *trans* effects in animals do so in “control” conditions, which may not reveal the full extent  
434 of selection forces that act on gene expression (Gonclaves et al., 2012, Osada et al., 2017, Davidson and  
435 Balakrishnan 2016, Signor and Nuzhdin 2018). In our system, we find evidence that the genes involved in  
436 the maintenance of basic metabolic functions of the uninfected fat body are under different selective  
437 pressures than those involved in immune response. Unlike the immune-responsive genes, which must  
438 contend with a continuously evolving pathogen landscape, the genes carrying out metabolic functions may  
439 be subject to stabilizing selection, given relatively unchanging nutritional availability. In future studies, it will  
440 be interesting to further probe which systems and conditions show enrichment for these different patterns of  
441 expression divergence.

442 Secondly, we observe that the relative contribution of *cis*- and *trans*-acting changes are perturbation-  
443 specific. Most notably, in response to *Efae* infection, *cis* effects dominate expression changes, while in the  
444 *Smar* infection, *trans* changes are predominant. The prevalence of either *cis* or *trans* effects can be  
445 reasonably justified in our system, but we did not anticipate that the proportion of these effects would be

446 infection specific. Because changes in *trans* factors have pleiotropic effects, it has been suggested that  
447 changes to these factors are under more selective constraint than *cis*-acting elements, and, thus, *cis* effects  
448 can more readily introduce small-scale variation into a system (Schaefer et al., 2013). In some cases,  
449 however, arriving at a more fit phenotype may require the coordinated alteration of expression of many  
450 genes, which may be more readily achieved by changes to *trans*-acting factors. In other cases, a coordinated  
451 change in all genes affected by perturbing a *trans*-acting factor may not yield a phenotype with a net  
452 beneficial effect, and it may be more likely that changes to individual genes offer paths to higher fitness. In  
453 our *D. melanogaster* lines, *S. marcescens* is more virulent than *E. faecalis* – a higher dose of *E. faecalis* is  
454 needed to achieve similar levels of mortality to that of *S. marcescens* (Supplemental Figure S1). It is possible  
455 that adaptation to highly virulent pathogens or rapidly evolving pathogens requires large-scale, synchronous  
456 changes to expression, whereas adaptation to less virulent pathogens is possible with smaller, localized  
457 mutations. Consequently, we suggest that the differences in the abundance of *cis* or *trans* effects may reflect  
458 the individual details different host-pathogen interactions and how that influences the genetic architecture of  
459 adaptation. Experiments with a wider range of pathogens will further illuminate the relationship between the  
460 mode of expression divergence and the host-pathogen relationship.

461 In summary, we find that the mode of expression divergence, as represented by the proportion of *cis*  
462 and *trans* effects in a system, is condition-specific in the *Drosophila melanogaster* abdominal fat body. This  
463 specificity is likely a result of the distinct selective pressures that different host-pathogen interactions exert on  
464 the *D. melanogaster* immune system. In the course of our study, we found several candidate genes that may  
465 be the sources of the observed *trans* effects, which are most prominent in *Smar* infection. To verify these  
466 effects, we aim to over-express these candidate genes in multiple genetic backgrounds in future  
467 experiments, which are becoming more feasible with the development of new genetic tools. In the longer  
468 term, we can combine the data sets presented here with other types of functional genomics experiments to  
469 identify immune-responsive *cis*-acting elements and the sequences changes that drive *cis*-acting divergence.

470 Taken together, these studies will provide a more comprehensive view of how regulation of expression in this  
471 rapidly changing system is wired and evolves.

472

## 473 **Methods**

### 474 *Animal genotypes, infection, and survival analysis*

475 The A4 and B6 *D. melanogaster* lines, SNP tables and genomic reads were received from the *Drosophila*  
476 Synthetic Population Resource (King et al., 2012). Flies were reared at 25°C on standard cornmeal/yeast  
477 media (recipe available upon request). For all RNA-seq experiments, four-day-old males were infected with  
478 approximately 15 nL of  $A_{600} = 0.5$  OD solution of either *Enterococcus faecalis* or *Serratia marcescens* via  
479 microinjection, yielding an infection of ~10,000 CFUs/fly (Khalil et al., 2015). Uninfected controls were placed  
480 on a carbon dioxide pad for 6 minutes to mimic the effects of anesthesia used for microinjection. Both  
481 bacteria were grown in liquid culture on a shaker at 37°C overnight and then diluted 1:1000 in fresh media in  
482 the morning. These cultures were grown until exponential phase (*S. marcescens* in Luria-Bertani broth for 4  
483 hours, *E. faecalis* in brain-heart infusion media for 5 hours). Bacteria were then pelleted down and  
484 resuspended in PBS for OD measurement and injection. All injections took place between 3:00 and 5:00 pm  
485 to account for the impact of circadian rhythm on immune response (Scheiermann et al., 2013). For the  
486 survival analysis, we used lower doses of infection to more effectively ascertain differences in survival. We  
487 infected A4 and B6 genotypes with either 5,000 CFUs of *E. faecalis* or 1,000 CFUs of *S. marcescens*, and  
488 the survival status of the flies was recorded once per day following infection (see Supplemental Figure S1 for  
489 details). To measure bacterial load, a sample of living flies were collected once per day, and we measured  
490 load with dilution plating as in (Khalil et al., 2015). Kaplan-Meier estimates of survival were calculated using  
491 the `survival` package in R (Therneau et al., 2020), and log-rank tests and plotting were performed using  
492 the `survminer` package (Kassambara and Kosinski 2019).

493 To determine the number of unique SNPs between A4 and B6, we downloaded published SNP tables  
494 available through the DSPR website (King et al., 2012). We selected for SNPs not shared between lines and



495 that also showed a reference allele frequency of  $< 0.05$  (implying an alternative allele frequency  $> 0.95$ ). We  
496 then calculated total SNP differences for exonic and non-exonic regions using exon coordinates from  
497 Flybase (dm6/iso-1: FB2019\_01) (Thurmond et al., 2019).

#### 498 *Preparation and sequencing of RNA-seq libraries*

499 Three hours after infection, abdominal filets with the attached fat bodies were prepared as in (Krupp and  
500 Levine et al., 2010). Three fat bodies per sample were suspended in Trizol (Life Technologies) and stored at  
501  $-80^{\circ}\text{C}$  for later extraction. RNA was extracted from samples using Zymo Research Direct-zol RNA Extraction  
502 Kits. Library construction was completed using a modified version of the Smart-Seq2 protocol outlined in  
503 (Serra et al., 2018). Samples were then sequenced on Illumina Next-seq Platform with NextSeq 500/550  
504 High Output Kit v2.5 to generate 43bp paired end reads. Data was imported to the UCI High Performance  
505 Computational Cluster for trimming and mapping of sequenced reads.

#### 506 *Differential expression analysis*

507 Reads were trimmed and filtered using Trimmomatic 0.35 (Bolger et al., 2014). Count and TPM data for each  
508 sample was then calculated using Salmon 0.12.0 aligner (Patro et al., 2017) using the dm6/iso-1  
509 transcriptome. Count matrices of gene-level data were then constructed in R using the `Tximport` 1.12.3  
510 package (Soneson et al., 2015). To find genes differentially expressed in response to each infection,  
511 compared to control, we used the `EdgeR` 3.26.5 package (Robinson et al., 2010, McCarthy et al., 2012),  
512 excluding lowly expressed genes ( $\text{CPM} < 1$ ) with false discovery rate corrected  $p$ -values (Benjamini and  
513 Yekutieli et al., 2001). Genes with an  $\text{FDR} < 0.05$  were considered differentially expressed. To determine  
514 genotype-specific effects, among the *Efae*- or *Smar*-responsive genes, we used EdgeR to find genes  
515 differentially expressed between A4 and B6 in either the control conditions or the treated condition.

#### 516 *Generation of A4 and B6 transcriptome annotations*

517 To map RNA-seq reads in an allele-specific manner, we created two reference transcriptomes by lifting over  
518 Iso-1 genome annotations to sequenced A4 and B6 genomes. Using tools from UCSC liftOver suite, custom  
519 chain files were created by mapping homologous sequences to the A4 or B6 genome (Salinas et al., 2016).  
520 To assess the quality of our annotations and remove genes with poor annotations, genomic sequencing

521 reads from the DSPR website where downloaded and aligned to our transcriptome files (Thurmond et al.,  
522 2019). We hypothesized that well-annotated genes would show similar coverage of genomic reads in both  
523 the A4 and B6 transcriptomes. We then filtered genes using two methods for outlier calling: a Poisson  
524 distribution-based method and a negative binomial generalized linear model (GLM) method, similar to that  
525 used for differential gene expression in RNA-seq experiments. For the Poisson method, we fit a Poisson  
526 distribution to gene count data for the A4 and B6 transcriptomes separately, using the  
527 `fitdistributionplus 1.0-14` package in R and called outlier genes using three thresholds of  
528 increasing stringency  $p = 0.001, 0.01$  and  $0.025$ . For the GLM-based approach, we looked for gene counts  
529 that were significantly different between the A4 and B6 transcriptomes and filtered genes using FDR  
530 thresholds of  $0.01, 0.05$  and  $0.09$ . As our threshold for significance became more stringent, we filtered out an  
531 increasing number of genes (Supplemental Figure S2). Genes found not to be outliers in either the Poisson  
532 or GLM method were then combined into gene sets based on the stringency of filtering. These gene sets  
533 were then used to quantify *cis* and *trans* effects for all three conditions. We found that the stringency of  
534 filtering did not significantly impact the total number or proportions of *cis* and *trans* effects between  
535 conditions. For the allele-specific expression analysis presented in Figure 3, we used a set of genes filtered  
536 using a combination of both methods at medium stringency.

### 537 *Allele-specific expression analysis*

538 RNA reads were assigned parental alleles using Allele Specific Alignment Pipeline (Krueger,  
539 <https://www.bioinformatics.babraham.ac.uk/projects/ASAP/>) using the A4 and B6 genomes and allowing for  
540 no mismatches. Non-uniquely assignable reads were discarded. Count and TPM data were then generated  
541 by aligning allelic reads to the corresponding transcriptome. Count matrices of gene-level data were then  
542 constructed in R using the `Tximport` package (Soneson et al., 2015). Accuracy of allele calling was  
543 assessed by the proportion of X chromosome reads that aligned to the maternal genotype versus the  
544 paternal genotype. Given that all the flies are male, any reads aligning to the paternal X chromosome can  
545 definitively be classified as mis-assigned.

546 To characterize expression divergence into *cis* and *trans* categories, differential expression was  
547 determined with unparsed parental reads and allele-specific reads from the F1 hybrids, using EdgeR and  
548 three distinct GLM structures. Genes not found in both A4 and B6 transcriptomes, lowly expressed genes  
549 (CPM<1) and X chromosome genes were excluded from the analysis. For each condition, we first tested for  
550 differential gene expression between parental samples (DE parents; Murad et al., 2019). Next we tested for  
551 allelic imbalance, taking into account parent of origin and maternal genotype effects as outlined in (Osada et  
552 al., 2017; Takada et al., 2017). For this test we used half of the F1 hybrid samples. Finally, we tested for  
553 *trans* effects using parental samples and the remaining F1 hybrid samples (J. Coolon pers. comm.). In all  
554 three tests, we assigned significance after adjusted *p*-values for multiple comparisons using the False  
555 Discovery Rate method (Benjamini and Yekutieli, 2001). Using the results from each test, we categorized  
556 each gene into one of five classes using the following logic, which is based on previous studies (Emerson  
557 and Li 2010, McManus et al., 2010):

558

| Category                  | DE parents | F1 allelic imbalance | <i>Trans</i> test |
|---------------------------|------------|----------------------|-------------------|
| <i>cis</i> only           | True       | True                 | False             |
| <i>trans</i> only         | True       | False                | True              |
| <i>cis</i> + <i>trans</i> | True       | True                 | True              |
| Compensatory              | False      | True                 | True              |
| Conserved                 | False      | False                | False             |

559 Any genes that did not fit into the patterns found above were categorized as “undetermined” and were  
560 excluded from further analysis. A complete list of genes and their categories for each condition is available in  
561 the Supplemental Data.

#### 562 Identification of sources of *trans* effects

563 To investigate potential sources of observed *trans* effects, we looked for genes differentially expressed in our  
564 uninfected samples. This included genes that are differentially expressed between A4 and B6 only uninfected  
565 samples and genes differentially expressed in response to infection and effects in the control (Groups 1 and

566 3 from Figures 1-2). These genes were then intersected with a list of known *Drosophila* transcription factors  
567 as well as known immune genes (De Gregorio et al., 2001; Lemaitre and Hoffman 2007; Celniker et al.,  
568 2013, Troha et al., 2018). Only genes that were transcription factors, immune detection genes, or immune  
569 signaling genes were considered to be candidates.

#### 570 Analysis of SNPs

571 To better understand the effects of sequence changes on coding regions between our lines we used the  
572 Ensemble Variant Effect Predictor Tool (VEP) to predict the effects of SNPs on the resulting amino acid  
573 sequence (McLauren et al., 2016). We first created two mutually exclusive lists of genes. The first list  
574 consists of genes found to be expressed in the unstimulated fat body above a CPM of 1 and excluding genes  
575 found to be differentially expressed in response to infection, this list was referred to as *fat body expressed*  
576 genes. The second list consists of only genes differentially expressed in response to infection with either  
577 *Efae* or *Smar*, referred to as *DE infection*. We then subsetted the *DE infection* genes to make a list of genes  
578 that are differentially expressed genes that are also previously verified immune response genes, which we  
579 called *DE immune*. For each list of genes, we pulled out SNPs falling into coding regions and ran these  
580 through VEP. The proportion of synonymous to non-synonymous SNPs was then compared between  
581 conditions.

#### 582 Description of statistical tests

583 *p*-values for all single and multiple proportion comparisons were calculated using R's `prop.test` function which  
584 performs a Chi-square test with Yate's continuity correction. For data where more than one test was  
585 performed, *p*-values were Bonferroni corrected by multiplying the *p*-value by the number of tests performed.

586

#### 587 **Data Access**

588 All raw and processed sequencing data generated in this study have been submitted to the NCBI Gene  
589 Expression Omnibus (GEO; <https://www.ncbi.nlm.nih.gov/geo/>) under accession number GSE155033.

590

#### 591 **Acknowledgements**

592 We would like to thank J.J. Emerson and Xinwin Zhang for their thoughtful comments and suggestions on  
593 this work, Ali Mortazavi and Lorraine Serra for their insight and access to sequencing equipment, Tom  
594 Schilling for access to microinjection equipment, Joseph Coolon, Carl de Boer and Rabi Murad for sharing  
595 their scripts as well as general guidance with computational protocols, and Anthony Long and Mahul  
596 Chakraborty for their insight helpful comments on the genomes utilized. This work was funded in part by the  
597 National Science Foundation, Award 1953324 to Z.W. B.R. was supported by an NSF Bridge to the  
598 Doctorate Fellowship. S.F. was supported by a UCI UROP award. O.O. was supported by NIH Grant R25  
599 GM055246, T34 GM136498, and an UCI UROP award.

600

#### 601 **Disclosure Declarations**

602 The authors have no conflicts of interest to declare.

603

#### 604 **References**

605

- 606 Benjamini, Y., & Yekutieli, D. (2001). The control of the false discovery rate in multiple testing under  
607 dependency. *Annals of Statistics*, 29(4), 1165–1188. <https://doi.org/10.1214/aos/1013699998>
- 608 Bischoff, V., Vignal, C., Duvic, B., Boneca, I. G., Hoffmann, J. A., & Royet, J. (2006). Downregulation of  
609 the *Drosophila* immune response by peptidoglycan- recognition proteins SC1 and SC2. *PLoS*  
610 *Pathogens*. <https://doi.org/10.1371/journal.ppat.0020014>
- 611 Bolger, A. M., Lohse, M., & Usadel, B. (2014). Trimmomatic: A flexible trimmer for Illumina sequence  
612 data. *Bioinformatics*, 30(15), 2114–2120. <https://doi.org/10.1093/bioinformatics/btu170>
- 613 Buchon, N., Silverman, N., & Cherry, S. (2014). Immunity in *Drosophila melanogaster* — from microbial  
614 recognition to whole- organism physiology. *Nature Publishing Group*, 14(12), 796–810.  
615 <https://doi.org/10.1038/nri3763>
- 616 Busse, M. S., Arnold, C. P., Towb, P., Katrivesis, J., & Wasserman, A. (2007). A kB sequence code for  
617 pathway-specific innate immune responses, 26(16), 3826–3835.  
618 <https://doi.org/10.1038/sj.emboj.7601798>
- 619 Charroux, B., Capo, F., Kurz, C. L., Peslier, S., Chaduli, D., Viallat-lieutaud, A., & Royet, J. (2018).  
620 Cytosolic and Secreted Peptidoglycan-Degrading Enzymes in *Drosophila* Respectively Control  
621 Local and Systemic Immune Responses to Microbiota. *Cell Host and Microbe*, 23(2), 215-228.e4.  
622 <https://doi.org/10.1016/j.chom.2017.12.007>

- 623 Coolon, J. D., McManus, C. J., Stevenson, K. R., Graveley, B. R., & Wittkopp, P. J. (2014). Tempo and  
624 mode of regulatory evolution in *Drosophila*. *Genome Research*, 24(5), 797–808.  
625 <https://doi.org/10.1101/gr.163014.113>
- 626 Davidson, J. H., & Balakrishnan, C. N. (2016). Gene Regulatory Evolution During Speciation in a  
627 Songbird. *G3&#58; Genes|Genomes|Genetics*, 6(5), 1357–1364.  
628 <https://doi.org/10.1534/g3.116.027946>
- 629 Emerson, J. J., & Li, W.-H. (2010). The genetic basis of evolutionary change in gene expression levels.  
630 *Philosophical Transactions of the Royal Society B: Biological Sciences*, 365(1552), 2581–2590.  
631 <https://doi.org/10.1098/rstb.2010.0005>
- 632 Frochoux, M. V., Bou Sleiman, M., Gardeux, V., Dainese, R., Hollis, B., Litovchenko, M., ... Deplancke,  
633 B. (2020). cis-regulatory variation modulates susceptibility to enteric infection in the *Drosophila*  
634 genetic reference panel. *Genome Biology*, 21(1), 6. <https://doi.org/10.1186/s13059-019-1912-z>
- 635 Goncalves, A., Leigh-Brown, S., Thybert, D., Stefflova, K., Turro, E., Flicek, P., ... Marioni, J. C. (2012).  
636 Extensive compensatory cis-trans regulation in the evolution of mouse gene expression. *Genome*  
637 *Research*, 22(12), 2376–2384. <https://doi.org/10.1101/gr.142281.112>
- 638 Hammonds, A. S., Bristow, C. A., Fisher, W. W., Weiszmann, R., Wu, S., Hartenstein, V., ... Celniker,  
639 S. E. (2013). Spatial expression of transcription factors in *Drosophila* embryonic organ  
640 development, 1–15.
- 641 Hanson, M. A., Dostálová, A., Ceroni, C., Poidevin, M., Kondo, S., & Lemaître, B. (2019). Synergy and  
642 remarkable specificity of antimicrobial peptides in vivo using a systematic knockout approach.  
643 *ELife*, 8, 1–24. <https://doi.org/10.7554/eLife.48778>
- 644 Hotson, A. G., & Schneider, D. S. (2015). *Drosophila melanogaster* natural variation affects growth  
645 dynamics of infecting *Listeria monocytogenes*. *G3: Genes, Genomes, Genetics*, 5(12), 2593–2600.  
646 <https://doi.org/10.1534/g3.115.022558>
- 647 Iatsenko, I., Kondo, S., Mengin-Lecreux, D., & Lemaître, B. (2016). PGRP-SD, an Extracellular Pattern-  
648 Recognition Receptor, Enhances Peptidoglycan-Mediated Activation of the *Drosophila* Imd  
649 Pathway. *Immunity*, 45(5), 1013–1023. <https://doi.org/10.1016/j.immuni.2016.10.029>
- 650 Juneja, P., Quinn, A., & Jiggins, F. M. (2016). Latitudinal clines in gene expression and cis -regulatory  
651 element variation in *Drosophila melanogaster*. *BMC Genomics*, 1–11.  
652 <https://doi.org/10.1186/s12864-016-3333-7>
- 653 Kassambara, A., & Kosinski, M. (2019). survminer: Drawing Survival Curves using “ggplot2.” Retrieved  
654 from <https://cran.r-project.org/package=survminer>
- 655 Khalil, S., Jacobson, E., Chambers, M. C., & Lazzaro, B. P. (2015). Systemic bacterial infection and  
656 immune defense phenotypes in *Drosophila melanogaster*. *Journal of Visualized Experiments*,  
657 2015(99), 1–9. <https://doi.org/10.3791/52613>
- 658 King, E. G., Macdonald, S. J., & Long, A. D. (2012). Properties and power of the *Drosophila* synthetic  
659 population resource for the routine dissection of complex traits. *Genetics*.  
660 <https://doi.org/10.1534/genetics.112.138537>

- 661 King, M. C., & Wilson, A. C. (1975). Evolutionary Two Levels in humans and Chimpanzees. *Science*,  
662 188(4184), 107–118. Retrieved from <http://www.jstor.org/stable/1739875>
- 663 Krueger, F. (n.d.). ASAP-Allele-specific alignment pipeline. Retrieved from  
664 <https://www.bioinformatics.babraham.ac.uk/projects/ASAP/>
- 665 Lazzaro, B. P., Scurman, B. K., Clark, A. G., & Sciences, B. (2004). Genetic Basis of Natural Variation  
666 in *D. melanogaster*. *Science*, 303(March), 1873–1877.
- 667 Lazzaro, B. P., Sackton, T. B., & Clark, A. G. (2006). Genetic Variation in *Drosophila melanogaster*  
668 Resistance to Infection: *Genetics*, 1554(November), 1539–1554.  
669 <https://doi.org/10.1534/genetics.105.054593>
- 670 Lemaitre, B., & Hoffmann, J. (2007). The Host Defense of *Drosophila melanogaster*.  
671 <https://doi.org/10.1146/annurev.immunol.25.022106.141615>
- 672 Lu, Y., Su, F., Li, Q., Zhang, J., Li, Y., Tang, T., ... Yu, X. Q. (2020). Pattern recognition receptors in  
673 *Drosophila* immune responses. *Developmental and Comparative Immunology*.  
674 <https://doi.org/10.1016/j.dci.2019.103468>
- 675 McCarthy, D. J., Chen, Y., & Smyth, G. K. (2012). Differential expression analysis of multifactor RNA-  
676 Seq experiments with respect to biological variation. *Nucleic Acids Research*, 40(10), 4288–4297.  
677 <https://doi.org/10.1093/nar/gks042>
- 678 McLaren, W., Gil, L., Hunt, S. E., Riat, H. S., Ritchie, G. R. S., Thormann, A., ... Cunningham, F. (2016).  
679 The Ensembl Variant Effect Predictor. *Genome Biology*, 17(1), 1–14.  
680 <https://doi.org/10.1186/s13059-016-0974-4>
- 681 McManus, C. J., Coolon, J. D., Duff, M. O., Eipper-Mains, J., Graveley, B. R., & Wittkopp, P. J. (2010).  
682 Regulatory divergence in *Drosophila* revealed by mRNA-seq. *Genome Research*, 20(6), 816–825.  
683 <https://doi.org/10.1101/gr.102491.109>
- 684 Murad, R., Macias-Muñoz, A., Wong, A., Ma, X., & Mortazavi, A. (2019). Integrative analysis of *Hydra*  
685 head regeneration reveals activation of distal enhancer-like elements. *BioRxiv*, 544049.  
686 <https://doi.org/10.1101/544049>
- 687 Osada, N., Miyagi, R., & Takahashi, A. (2017). Cis- and trans-regulatory effects on gene expression in  
688 a natural population of *Drosophila melanogaster*. *Genetics*, XXX(June), 1–12.  
689 <https://doi.org/10.1534/genetics.XXX.XXXXXX>
- 690 Patro, R., Duggal, G., Love, M. I., Irizarry, R. A., & Kingsford, C. (2017). Salmon provides fast and bias-  
691 aware quantification of transcript expression. *Nature Methods*, 14(4), 417–419.  
692 <https://doi.org/10.1038/nmeth.4197>
- 693 Pearson, W. R. (2013). Selecting the Right EMR Vendor Selecting the Right EMR Vendor. *Curr Protoc*  
694 *Bioinformatics*, (43), 3.5.1–3.5.9. <https://doi.org/10.1002/0471250953.bi0305s43.Selecting>
- 695 Robinson, M. D., McCarthy, D. J., & Smyth, G. K. (2010). edgeR: a Bioconductor package for differential  
696 expression analysis of digital gene expression data. *Bioinformatics*, 26(1), 139–140.  
697 <https://doi.org/10.1093/bioinformatics/btp616>

- 698 Sackton, T. B., Lazzaro, B. P., & Clark, A. G. (2010). Genotype and Gene Expression Associations with  
699 Immune Function in *Drosophila*. *PLoS Genetics*, 6(1). <https://doi.org/10.1371/journal.pgen.1000797>
- 700 Salinas, F., De Boer, C. G., Abarca, V., García, V., Cuevas, M., Araos, S., ... Cubillos, F. A. (2016).  
701 Natural variation in non-coding regions underlying phenotypic diversity in budding yeast. *Scientific*  
702 *Reports*, 6, 1–13. <https://doi.org/10.1038/srep21849>
- 703 Schaefer, B., Emerson, J. J., Wang, T. Y., Lu, M. Y. J., Hsieh, L. C., & Li, W. H. (2013). Inheritance of  
704 gene expression level and selective constraints on trans- and cis-regulatory changes in yeast.  
705 *Molecular Biology and Evolution*, 30(9), 2121–2133. <https://doi.org/10.1093/molbev/mst114>
- 706 Scheiermann, C., Kunisaki, Y., & Frenette, P. S. (2013). Circadian control of the immune system. *Nature*  
707 *Reviews Immunology*, 13(3), 190–198. <https://doi.org/10.1038/nri3386>
- 708 Serra, L., Chang, D., Macchietto, M., Williams, K., Murad, R., Lu, D., ... Mortazavi, A. (2018). Adapting  
709 the Smart-seq2 Protocol for Robust Single Worm RNA-seq. *Bio-Protocol*, 8(4), 1–16.  
710 <https://doi.org/10.21769/bioprotoc.2729>
- 711 Signor, S. A., & Nuzhdin, S. V. (2018). The Evolution of Gene Expression in cis and trans. *Trends in*  
712 *Genetics*, 34(7), 532–544. <https://doi.org/10.1016/j.tig.2018.03.007>
- 713 Sonesson, C., Love, M. I., & Robinson, M. D. (2015). Differential analyses for RNA-seq: transcript-level  
714 estimates improve gene-level inferences. *F1000Research*, 4(1521).  
715 <https://doi.org/10.12688/f1000research.7563.1>
- 716 Takada, Y., Miyagi, R., Takahashi, A., Endo, T., & Osada, N. (2017). A Generalized Linear Model for  
717 Decomposing Cis-regulatory, Parent-of-Origin, and Maternal Effects on Allele-Specific Gene  
718 Expression. *G3 (Bethesda, Md.) Genes/Genomes/Genetics Genes/Genomes/Genetics*, 7(7),  
719 2227–2234. <https://doi.org/10.1534/g3.117.042895>
- 720 Tanji, T., Yun, E. Y., & Ip, Y. T. (2010). Heterodimers of NF- $\kappa$ B transcription factors DIF and Relish  
721 regulate antimicrobial peptide genes in *Drosophila*. *Proceedings of the National Academy of*  
722 *Sciences of the United States of America*. <https://doi.org/10.1073/pnas.1009473107>
- 723 Therneau, T. M. (2020). A Package for Survival Analysis in R. Retrieved from [https://cran.r-](https://cran.r-project.org/package=survival)  
724 [project.org/package=survival](https://cran.r-project.org/package=survival)
- 725 Therneau, T. M. (2000). *Modeling Survival Data: Extending the Cox Model*. New York: Springer.  
726 Retrieved from <https://cran.r-project.org/package=survival>
- 727 Thurmond, J., Goodman, J. L., Strelets, V. B., Attrill, H., Gramates, L. S., Marygold, S. J., ... Baker, P.  
728 (2019). FlyBase 2.0: The next generation. *Nucleic Acids Research*, 47(D1), D759–D765.  
729 <https://doi.org/10.1093/nar/gky1003>
- 730 Troha, K., Im, J. H., Revah, J., Lazzaro, B. P., & Buchon, N. (2018). *Comparative transcriptomics*  
731 *reveals CrebA as a novel regulator of infection tolerance in D. melanogaster*. *PLoS Pathogens*  
732 (Vol. 14). <https://doi.org/10.1371/journal.ppat.1006847>
- 733 Wittkopp, P. J., Haerum, B. K., & Clark, A. G. (2004). Evolutionary changes in cis and trans gene  
734 regulation. *Nature Publishing Group*, 430(1), 85–88.



- 735 Wittkopp, P. J., Haerum, B. K., & Clark, A. G. (2008). Regulatory changes underlying expression  
736 differences within and between *Drosophila* species. *Nature Genetics*, *40*(3), 346–350.  
737 <https://doi.org/10.1038/ng.77>
- 738 Zaidman-Rémy, A., Hervé, M., Poidevin, M., Pili-Floury, S., Kim, M. S., Blanot, D., ... Lemaitre, B.  
739 (2006). The *Drosophila* Amidase PGRP-LB Modulates the Immune Response to Bacterial  
740 Infection. *Immunity*, *24*(4), 463–473. <https://doi.org/10.1016/j.immuni.2006.02.012>
- 741 Zhang, X., Emerson, J. J. (2019). Inferring Compensatory Evolution of cis- and trans-Regulatory  
742 Variation. *Trends in Genetics*, *35*(1), 1–3. <https://doi.org/10.1016/j.tig.2018.11.003>
